# Supplementary material
Source: PubMed Central journal article supplement (PMC5237605)

### **Supplemental Figure legends**

**Figure S1: Comparison of anti-CD3 mAb-loaded aAPC (KT64/86) vs. anti-CD3/28 beads.**  
Illustration showing the similarities and differences between bead-based and aAPC-based UCB tTreg stimulation.

Figure S1: Comparison of  $\alpha$ CD3-loaded aAPC (KT64/86) vs.  $\alpha$ CD3/28 beads.

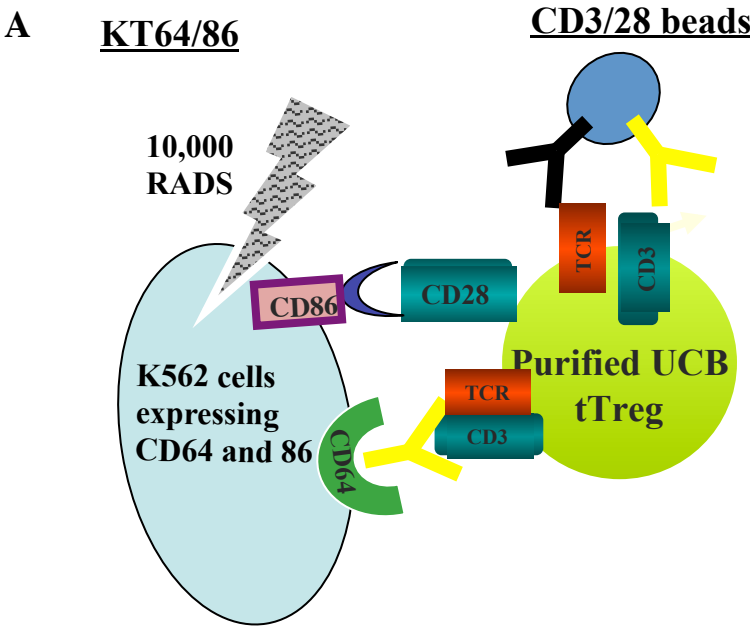

Supplement: NIHMS837732-supplement-supplement_1.pdf [file NIHMS837732-supplement-supplement_1.pdf]
